# Supplementary material
Source: MDPI journal article supplement (https://www.mdpi.com/2073-445X/11/5/729)
Supplement: s1 [file s1]

Archive with 3 entries (3 files):
- Supplementary Material File S1.xlsm
- Supplementary Material File S2.xlsx
- Supplementary Material File S3.pdf
