# Supplementary material
Source: MDPI journal article supplement (https://www.mdpi.com/2073-445X/11/5/729)
Supplement: s1 [file s1 › Supplementary Material File S1.xlsm]

## Sheet: General information
				S1 - Excel Tool for the evaluation of the sustainability

## Sheet: Input data
		Input data
		Experiment
		Study site:	7. Tachenhausen, DE
		Description of experiment:	Cover crops x Glyphosate interaction on microbial dynamics
		Proposed clustering:	Soil improving crops
					Treatment ID	Treatment description
		Managing organisation:	University Hohenheim (5)	SICS treatment:		SICS : UH_EX1_TR1 & UH_EX1_TR2: Cover crops with and without glyphosate
		Experiment ID	UH_EX1	Control:		Control : UH_EX1_TR3 & UH_EX1_TR4: Bare fallow control with and without glyphosate
		Environmental data
		Indicators	Impact of SICS	Measurement method	Remarks
		Infiltration	No change	Double ring
		Aggregate stability	Negative change	Wet sieving
		Bulk density	Positive change	Core method-ISO11272
		Penetration resistance	No data
		Mineral nitrogen	No change	Continuous flow analysis (ISO7150-2
		SOC	No change	Elemental analysis
		pH	No change	KCl solution
		Earthworm density	No change	Mustard solution
		Crop yield	No change	Farmer information
		Yield quality	No change	Other
		Crop cover characteristics	Positive change	Frame
		Pests	No data
		Root diseases	No data
		Weed diseases	No change	Other
		Economic data
		Indicators	Control group	SICS	Data quality	Remarks
		Total costs	3098	3365	Some uncertainties / missing data
		Total benefits	2837	2999	High certainty / data completeness
		Socio-cultural data
		Did the SICS testing/implementation affect the workload? To what extent?	Remarks
		Yes, workload increased slightly
		If the workload increased, did the increase occur during peak time?	Remarks
		No
		Do you perceive any risks that go along with the tested SICS? Please specify			Remarks
		Health risk		No, no potential health risk
		Economic risk		No, no potential economic risk
		Risk of crop failure		No, no potential risk of crop failure
		Risk of conflicts (with neighbours, withing community, etc.)		No, no potential risk of conflicts
		Any other risks		No, no other potential risks
		Does the farmer reputation change due to the SICS implementation?	Remarks
		Yes, farmer reputation improved

## Sheet: Results
		Results
		Input data
		Case study
		Study Site:	7. Tachenhausen, DE
		Managing organisation:	University Hohenheim (5)			Treatment ID	Treatment description
		Proposed clustering:	Soil improving crops		SICS treatment:	0	SICS : UH_EX1_TR1 & UH_EX1_TR2: Cover crops with and without glyphosate
		Experiment ID:	UH_EX1		Control:	0	Control : UH_EX1_TR3 & UH_EX1_TR4: Bare fallow control with and without glyphosate
		Description of experiment:	Cover crops x Glyphosate interaction on microbial dynamics
		Environmental data			Economic data			Sociocultural data
		Indicator	Impact of SICS		Indicator	Impact of SICS		Indicator	Impact of SICS
		Infiltration	No change		Cost-benefit	2837		Change in workload	Increase of workload
		Aggregate stability	Negative change					Timing of addional workload	Workload change at lowtime
		Bulk density	Positive change					Health Risks	No potential health risk
		Penetration resistance	No data					Economic risk	No potential economic risk
		Mineral nitrogen	No change					Crop failure	No potential risk of crop failure
		SOC	No change					Conflicts	No potential risk of conflicts
		pH	No change					Other risks	No potential other risks
		Earthworm density	No change					Farmer reputation	Farmer reputation improved
		Crop yield	No change
		Yield quality	No change
		Crop cover characteristics	Positive change
		Pests	No data
		Root diseases	No data
		Weed diseases	No change
		Sustainability indices
		Overall sustainability
			Impact index -1 = Strong negative impact (red) 0 = No significant impact (white) 1 = Strong positive impact (green)	Data completness index (DCI) 1 = All input variables have been considered 0 = No input variables have been considered	Data completness rating DCI = 1: Complete 1 > DCI >= 0.8: High 0.8 > DCE >= 0.4: Medium 0.4 > DCI: Low
		Sustainability	0.0599771	0.6	Medium
		Environmental dimension	0.123	0.78	Medium
		Economic dimension	-0.0320762		High
		Socio-cultural dimension	0.068	1	Complete
		Physical properties	0.33	0.9	High
		Chemical properties	0.05	0.9	High
		Biological properties	0.1	0.7	Medium
		Environmental dimension
			Impact index -1 = Strong negative impact (red) 0 = No significant impact (white) 1 = Strong positive impact (green)	Data completness index (DCI) 1 = All input variables have been considered 0 = No input variables have been considered	Data completness rating DCI = 1: Complete 1 > DCI >= 0.8: High 0.8 > DCE >= 0.4: Medium 0.4 > DCI: Low	Method index (MI) 1 = Result are based on recommended methods 0 = Results are not based on recommended methods	Method rating MI > 0.8: Very good 0.8 >= MI > 0.6: Good 0.6 >= MI > 0.4: Acceptable MI <= 0.4: Insufficient
		Envrionmental dimention	0.123	0.78	Medium	#N/A	#N/A
		Clusters
		Soil cultivation	0.33	0.9	High	#N/A	#N/A
		Fertilisation	0.05	0.9	High	#N/A	#N/A
		SoilImprovingCrops	0.1	0.7	Medium	#N/A	#N/A
		Compaction	0.15	0.8	High	#N/A	#N/A
		Properties
		Physical properties	0.33	0.9	High	0.9	Very good
		Chemical properties	0.05	0.9	High	0.9	Very good
		Biological properties	0.1	0.7	Medium	0.7	Good
		Soil quality	-0.0357143	0.964286	High	#N/A	#N/A
		Economic dimension
			Impact index -1 = Strong negative impact (red) 0 = No significant impact (white) 1 = Strong positive impact (green)	Data completness index (DCI) 1 = All input variables have been considered 0 = No input variables have been considered	Data completness rating
		Economic dimension	-0.0320762		High
		Cost	0.0861846	0.9	Some uncertainties / missing data
		Benetits	0.0571026	1	High certainty / data completeness
		Sociocultural data
			Impact index -1 = Strong negative impact (red) 0 = No significant impact (white) 1 = Strong positive impact (green)	Data completness index (DCI) 1 = All input variables have been considered 0 = No input variables have been considered	Data completness rating DCI = 1: Complete 1 > DCI >= 0.8: High 0.8 > DCE >= 0.4: Medium 0.4 > DCI: Low
		Socio-cultural dimension	0.068	1	Complete
		Workload	-0.33	1	Complete
		Perceived risks	0	1	Complete
		Farmer reputation	1	1	Complete
		Other indices
		Drawbacks and benefits
		Benefits:	Bulk density; Crop cover characteristics; Farmer reputation improved; Benefits;
		Drawback:	Aggregate stability; Increase of workload; Cost-benefit; Costs;
		Synthesis
		Physical properties	0.33
		Chemical properties	0.05
		Biological properties	0.1
		Cost-Benefit	-0.0320762
		Sociocultural	0.068

## Sheet: Experiment IDs
Study Site	Managing organisation	Proposed clustering	Description of experiment	ID experiment	Description of treatment	ID treatment		Level 1 list		Study Site	Magaging organisation	ID_studySite	ID_studySite_2		Level 2 lists	Proposed clustering		BDB		NIBIO		UP		UNIBE		AU		GWCT		UH		ICPA		UNIPD		IA		ESAC		TUC		SLU		VURV		UAL		FRAB
1. Flanders, BE	Bodemkundige Dienst van België (12)	Fertilization/Amendments	Organic soil amendments in wheat fields	BDB_EX1	no fertilization	BDB_EX1_TR1		selected	7. Tachenhausen, DE	1. Flanders, BE	Bodemkundige Dienst van België (12)	BDB	BDB_2		selected	Soil improving crops		Fertilization/Amendments		Compaction		Fertilization/Amendments		Compaction		Soil improving crops		Compaction		Soil improving crops		Compaction		Soil improving crops		Fertilization/Amendments		Soil improving crops		Soil improving crops		Compaction		Fertilization/Amendments		Soil improving crops		Soil improving crops
1. Flanders, BE	Bodemkundige Dienst van België (12)	Fertilization/Amendments	Organic soil amendments in wheat fields	BDB_EX1	mineral fertilization	BDB_EX1_TR2		coverted	UH	2. Akershus, NO	NIBIO (11)	NIBIO	NIBIO_2					Soil cultivation		Soil improving crops		Soil cultivation		Fertilization/Amendments				Soil improving crops										Fertilization/Amendments		Soil cultivation				Soil cultivation		Soil cultivation		Soil cultivation
1. Flanders, BE	Bodemkundige Dienst van België (12)	Fertilization/Amendments	Organic soil amendments in wheat fields	BDB_EX1	VFG compost	BDB_EX1_TR3				3. Keszthely, HU	University of Pannonia (22)	UP	UP_2											Soil improving crops
1. Flanders, BE	Bodemkundige Dienst van België (12)	Fertilization/Amendments	Organic soil amendments in wheat fields	BDB_EX1	wood chips	BDB_EX1_TR4				4. Frauenfeld, CH	UBERN (9)	UNIBE	UNIBE_2
1. Flanders, BE	Bodemkundige Dienst van België (12)	Fertilization/Amendments	Organic soil amendments in wheat fields	BDB_EX1	Solid pig manure	BDB_EX1_TR5		MO	University Hohenheim (5)	5. Viborg, DK	Aarhus University (13)	AU	AU_2
1. Flanders, BE	Bodemkundige Dienst van België (12)	Fertilization/Amendments	Organic soil amendments in wheat fields	BDB_EX1	pig manure + lava grit	BDB_EX1_TR6		ID_studySite_2	UH_2	6. Loddington, GB	GWCT Allerton Project (14)	GWCT	GWCT_2
1. Flanders, BE	Bodemkundige Dienst van België (12)	Soil cultivation	Soil cultivation and soil cover in maize	BDB_EX2	conventional ploughing	BDB_EX2_TR1				7. Tachenhausen, DE	University Hohenheim (5)	UH	UH_2
1. Flanders, BE	Bodemkundige Dienst van België (12)	Soil cultivation	Soil cultivation and soil cover in maize	BDB_EX2	non inversion till + herbicide	BDB_EX2_TR2				8. Draganesti Vlasca, RO	ICPA (18)	ICPA	ICPA_2
1. Flanders, BE	Bodemkundige Dienst van België (12)	Soil cultivation	Soil cultivation and soil cover in maize	BDB_EX2	conventional ploughing + undersowing of grass	BDB_EX2_TR3				9. Legnaro, IT	UNIPD (19)	UNIPD	UNIPD_2
1. Flanders, BE	Bodemkundige Dienst van België (12)	Soil cultivation	Soil cultivation and soil cover in maize	BDB_EX2	strip-till + herbicide /destroyed rye cover crop	BDB_EX2_TR4				10. Szaniawy, PL	Institute of Agrophysics, Polish Academy of Sciences (20)	IA	IA_2
1. Flanders, BE	Bodemkundige Dienst van België (12)	Soil cultivation	Soil cultivation and soil cover in maize	BDB_EX2	strip-till in living rye cover crop	BDB_EX2_TR5				11. Caldeirão, PT	IPC/ESAC (17)	ESAC	ESAC_2
2. Akershus, NO	NIBIO (11)	Compaction	Biological compaction release	NIBIO_EX2	Rotation barley- oilseed- barley	NIBIO_EX2_TR1				12. Chania, Crete, GR	Technical University of Crete (7)	TUC	TUC_2
2. Akershus, NO	NIBIO (11)	Compaction	Biological compaction release	NIBIO_EX2	Rotation oilseed- barley - oilseed	NIBIO_EX2_TR2				13. Orup, SE	SLU (23)	SLU	SLU_2
2. Akershus, NO	NIBIO (11)	Compaction	Biological compaction release	NIBIO_EX2	Barley only	NIBIO_EX2_TR3				14. Prague-Ruzyně, CZ	Crop Research Institute (25)	VURV	VURV_2
2. Akershus, NO	NIBIO (11)	Compaction	Biological compaction release	NIBIO_EX2	Alfalfa in rotation with barley	NIBIO_EX2_TR4				15. Almeria, ES	University of Almería (26)	UAL	UAL_2
2. Akershus, NO	NIBIO (11)	Soil improving crops	Cover crop	NIBIO_EX1	Control	NIBIO_EX1_TR1				16. Brittany, FR	FRAB (27)	FRAB	FRAB_2
2. Akershus, NO	NIBIO (11)	Soil improving crops	Cover crop	NIBIO_EX1	SN - Spring sown nitrogen fixating cover crop	NIBIO_EX1_TR2
2. Akershus, NO	NIBIO (11)	Soil improving crops	Cover crop	NIBIO_EX1	AN - Autumn sown nitrogen fixating cover crop	NIBIO_EX1_TR3
2. Akershus, NO	NIBIO (11)	Soil improving crops	Cover crop	NIBIO_EX1	SR - Spring sown cover crops root mix	NIBIO_EX1_TR4
2. Akershus, NO	NIBIO (11)	Soil improving crops	Cover crop	NIBIO_EX1	AR - Autumn sown cover crops root mix	NIBIO_EX1_TR5
3. Keszthely, HU	University of Pannonia (22)	Fertilization/Amendments	Organic/inorganic N fertilization	UP_EX1	N0 + no organic N0: 0 kg/ha N	UP_EX1_TR1
3. Keszthely, HU	University of Pannonia (22)	Fertilization/Amendments	Organic/inorganic N fertilization	UP_EX1	N0 + FYM (Farmyard Manure) N0: 0 kg/ha N	UP_EX1_TR2										Descritpion of experiments
3. Keszthely, HU	University of Pannonia (22)	Fertilization/Amendments	Organic/inorganic N fertilization	UP_EX1	N0 + St (Straw /residues buried) N0: 0 kg/ha N	UP_EX1_TR3				Studysite	Description of experiment	Proposed clustering	ID experiment					BDB_2		NIBIO_2		UP_2		UNIBE_2		AU_2		GWCT_2		UH_2		ICPA_2		UNIPD_2		IA_2		ESAC_2		TUC_2		SLU_2		VURV_2		UAL_2		FRAB_2
3. Keszthely, HU	University of Pannonia (22)	Fertilization/Amendments	Organic/inorganic N fertilization	UP_EX1	N3 + no organic (N3: 210 (maize), 150 (wheat), 120 (barley) kg/ha N)	UP_EX1_TR4		Study site	7. Tachenhausen, DE	1. Flanders, BE	Organic soil amendments in wheat fields	Fertilization/Amendments	BDB_EX1					Organic soil amendments in wheat fields		Biological compaction release		Organic/inorganic N fertilization		Grass stripes		CROPSYS		Compaction alleviation		Cover crops x Glyphosate interaction on microbial dynamics		soil tillage effects on soil quality		TCC (Tillage and Cover Crop)		effect of crops (leguminuous), liming and manure		BB_Rotation System		Soil erosion rate assessment		Sub soil loosening		Tillage experiment and different N application		Aguamarga		Wheat Early Sowing
3. Keszthely, HU	University of Pannonia (22)	Fertilization/Amendments	Organic/inorganic N fertilization	UP_EX1	N3 + FYM (N3: 210 (maize), 150 (wheat), 120 (barley) kg/ha N)	UP_EX1_TR5		coverted_2	UH_2	1. Flanders, BE	Soil cultivation and soil cover in maize	Soil cultivation	BDB_EX2					Soil cultivation and soil cover in maize		Cover crop		Tillage in maize-wheat biculture		CULTAN				Grass ley										TV_Sucession System								Tabernas		Cover crops
3. Keszthely, HU	University of Pannonia (22)	Fertilization/Amendments	Organic/inorganic N fertilization	UP_EX1	N3 + St (N3: 210 (maize), 150 (wheat), 120 (barley) kg/ha N)	UP_EX1_TR6				2. Akershus, NO	Biological compaction release	Compaction	NIBIO_EX2											Glyphosate / green manure and minimum tillage														SS_Organic Ferlization										Maize Direct Sowing
3. Keszthely, HU	University of Pannonia (22)	Soil cultivation	Tillage in maize-wheat biculture	UP_EX2	Covnetional + N0 N0: 0 kg/ha N	UP_EX2_TR1		Experiment	Cover crops x Glyphosate interaction on microbial dynamics	2. Akershus, NO	Cover crop	Soil improving crops	NIBIO_EX1																									LT_Sucession System
3. Keszthely, HU	University of Pannonia (22)	Soil cultivation	Tillage in maize-wheat biculture	UP_EX2	Covnetional + N2 (N2: 180 (maize), 160 (wheat) kg/ha N)	UP_EX2_TR2				3. Keszthely, HU	Organic/inorganic N fertilization	Fertilization/Amendments	UP_EX1
3. Keszthely, HU	University of Pannonia (22)	Soil cultivation	Tillage in maize-wheat biculture	UP_EX2	Minimum+N0 N0: 0 kg/ha N	UP_EX2_TR3				3. Keszthely, HU	Tillage in maize-wheat biculture	Soil cultivation	UP_EX2
3. Keszthely, HU	University of Pannonia (22)	Soil cultivation	Tillage in maize-wheat biculture	UP_EX2	Minimum+N2 (N2: 180 (maize), 160 (wheat) kg/ha N)	UP_EX2_TR4		Id_exp	UH_EX1	4. Frauenfeld, CH	Grass stripes	Compaction	UNIBE_EX1
4. Frauenfeld, CH	UBERN (9)	Compaction	Grass stripes	UNIBE_EX1	HSE-Green Verge	UNIBE_EX1_TR1		Prop cluster	Soil improving crops	4. Frauenfeld, CH	CULTAN	Fertilization/Amendments	UNIBE_EX2
4. Frauenfeld, CH	UBERN (9)	Compaction	Grass stripes	UNIBE_EX1	HSK-cropping area	UNIBE_EX1_TR2				4. Frauenfeld, CH	Glyphosate / green manure and minimum tillage	Soil improving crops, Compaction	UNIBE_EX3
4. Frauenfeld, CH	UBERN (9)	Fertilization/Amendments	CULTAN	UNIBE_EX2	UDE-CULTAN	UNIBE_EX2_TR1				5. Viborg, DK	CROPSYS	Soil improving crops	AU_EX1					BDB_EX1		UNIBE_EX1		UH_EX1		ESAC_EX3		UAL_EX2
4. Frauenfeld, CH	UBERN (9)	Fertilization/Amendments	CULTAN	UNIBE_EX2	UDK2-min. conventional (Lonza-Sol)	UNIBE_EX2_TR2				6. Loddington, GB	Compaction alleviation	Compaction	GWCT_EX1					Fertilization/Amendments		Compaction		Soil improving crops		Fertilization/Amendments		Soil cultivation
4. Frauenfeld, CH	UBERN (9)	Fertilization/Amendments	CULTAN	UNIBE_EX2	UDK1-org. conventional (pig manure)	UNIBE_EX2_TR3				6. Loddington, GB	Grass ley	Soil improving crops	GWCT_EX2
4. Frauenfeld, CH	UBERN (9)	Soil improving crops, Compaction	Glyphosate / green manure and minimum tillage	UNIBE_EX3	USE-Green Manure, no pesticide	UNIBE_EX3_TR1				7. Tachenhausen, DE	Cover crops x Glyphosate interaction on microbial dynamics	Soil improving crops	UH_EX1
4. Frauenfeld, CH	UBERN (9)	Soil improving crops, Compaction	Glyphosate / green manure and minimum tillage	UNIBE_EX3	USK-naked soil, glyphosate	UNIBE_EX3_TR2				8. Draganesti Vlasca, RO	soil tillage effects on soil quality	Compaction	ICPA_EX1					BDB_EX2		UNIBE_EX2		ICPA_EX1		ESAC_EX4		FRAB_EX1
5. Viborg, DK	Aarhus University (13)	Soil improving crops	CROPSYS	AU_EX1	O2/+M/-CC	AU_EX1_TR1				9. Legnaro, IT	TCC (Tillage and Cover Crop)	Soil improving crops	UNIPD_EX1					Soil cultivation		Fertilization/Amendments		Compaction		Soil improving crops		Soil improving crops
5. Viborg, DK	Aarhus University (13)	Soil improving crops	CROPSYS	AU_EX1	O2/-M/+CC	AU_EX1_TR2				10. Szaniawy, PL	effect of crops (leguminuous), liming and manure	Fertilization/Amendments	IA_EX1
5. Viborg, DK	Aarhus University (13)	Soil improving crops	CROPSYS	AU_EX1	O2/+M/+CC	AU_EX1_TR3				11. Caldeirão, PT	BB_Rotation System	Soil improving crops	ESAC_EX1
5. Viborg, DK	Aarhus University (13)	Soil improving crops	CROPSYS	AU_EX1	O4/+M/-CC	AU_EX1_TR4				11. Caldeirão, PT	TV_Sucession System	Soil improving crops	ESAC_EX2					NIBIO_EX2		UNIBE_EX3		UNIPD_EX1		TUC_EX1		FRAB_EX2
5. Viborg, DK	Aarhus University (13)	Soil improving crops	CROPSYS	AU_EX1	O4/-M/+CC	AU_EX1_TR5				11. Caldeirão, PT	SS_Organic Ferlization	Fertilization/Amendments	ESAC_EX3					Compaction		Soil improving crops		Soil improving crops		Soil cultivation		Soil improving crops
5. Viborg, DK	Aarhus University (13)	Soil improving crops	CROPSYS	AU_EX1	O4/+M/+CC	AU_EX1_TR6				11. Caldeirão, PT	LT_Sucession System	Soil improving crops	ESAC_EX4							Compaction				Soil improving crops
5. Viborg, DK	Aarhus University (13)	Soil improving crops	CROPSYS	AU_EX1	C4/+F/-CC	AU_EX1_TR7				12. Chania, Crete, GR	Soil erosion rate assessment	Soil cultivation -Soil improving crops	TUC_EX1
5. Viborg, DK	Aarhus University (13)	Soil improving crops	CROPSYS	AU_EX1	C4/+F/+CC	AU_EX1_TR8				13. Orup, SE	Sub soil loosening	Compaction	SLU_EX1					NIBIO_EX1		AU_EX1		IA_EX1		SLU_EX1		FRAB_EX3
6. Loddington, GB	GWCT Allerton Project (14)	Compaction	Compaction alleviation	GWCT_EX1	Plough	GWCT_EX1_TR1				14. Prague-Ruzyně, CZ	Tillage experiment and different N application	Soil cultivation, Fertilization/Amendments	VURV_EX1					Soil improving crops		Soil improving crops		Fertilization/Amendments		Compaction		Soil cultivation
6. Loddington, GB	GWCT Allerton Project (14)	Compaction	Compaction alleviation	GWCT_EX1	Low disturbance subsoiler	GWCT_EX1_TR2				15. Almeria, ES	Aguamarga	Soil cultivation-Soil improving crops	UAL_EX1
6. Loddington, GB	GWCT Allerton Project (14)	Compaction	Compaction alleviation	GWCT_EX1	AMF innoculant	GWCT_EX1_TR3				15. Almeria, ES	Tabernas	Soil cultivation	UAL_EX2
6. Loddington, GB	GWCT Allerton Project (14)	Compaction	Compaction alleviation	GWCT_EX1	Control-no til	GWCT_EX1_TR4				16. Brittany, FR	Wheat Early Sowing	Soil improving crops	FRAB_EX1					UP_EX1		GWCT_EX1		ESAC_EX1		VURV_EX1
6. Loddington, GB	GWCT Allerton Project (14)	Soil improving crops	Grass ley	GWCT_EX2	Cultivar - Aberniche	GWCT_EX2_TR1				16. Brittany, FR	Cover crops	Soil improving crops	FRAB_EX2					Fertilization/Amendments		Compaction		Soil improving crops		Soil cultivation
6. Loddington, GB	GWCT Allerton Project (14)	Soil improving crops	Grass ley	GWCT_EX2	Cultivar - Perseus	GWCT_EX2_TR2				16. Brittany, FR	Maize Direct Sowing	Soil cultivation	FRAB_EX3											Fertilization/Amendments
6. Loddington, GB	GWCT Allerton Project (14)	Soil improving crops	Grass ley	GWCT_EX2	Cultivar - Fojtan	GWCT_EX2_TR3
6. Loddington, GB	GWCT Allerton Project (14)	Soil improving crops	Grass ley	GWCT_EX2	Cultivar - Lofa	GWCT_EX2_TR4												UP_EX2		GWCT_EX2		ESAC_EX2		UAL_EX1
6. Loddington, GB	GWCT Allerton Project (14)	Soil improving crops	Grass ley	GWCT_EX2	Cultivar - Donata	GWCT_EX2_TR5												Soil cultivation		Soil improving crops		Soil improving crops		Soil cultivation
6. Loddington, GB	GWCT Allerton Project (14)	Soil improving crops	Grass ley	GWCT_EX2	Control-Mixture of ryegrass and clover	GWCT_EX2_TR6																		Soil improving crops
7. Tachenhausen, DE	University Hohenheim (5)	Soil improving crops	Cover crops x Glyphosate interaction on microbial dynamics	UH_EX1	Glyphosate+cover crops	UH_EX1_TR1
7. Tachenhausen, DE	University Hohenheim (5)	Soil improving crops	Cover crops x Glyphosate interaction on microbial dynamics	UH_EX1	No Glyphosate+cover crops	UH_EX1_TR2
7. Tachenhausen, DE	University Hohenheim (5)	Soil improving crops	Cover crops x Glyphosate interaction on microbial dynamics	UH_EX1	Glyphosate+fallow	UH_EX1_TR3
7. Tachenhausen, DE	University Hohenheim (5)	Soil improving crops	Cover crops x Glyphosate interaction on microbial dynamics	UH_EX1	No Glyphosate+fallow	UH_EX1_TR4
8. Draganesti Vlasca, RO	ICPA (18)	Compaction	soil tillage effects on soil quality	ICPA_EX1	Mouldboard ploughing	ICPA_EX1_TR1
8. Draganesti Vlasca, RO	ICPA (18)	Compaction	soil tillage effects on soil quality	ICPA_EX1	Subsoiling	ICPA_EX1_TR2
8. Draganesti Vlasca, RO	ICPA (18)	Compaction	soil tillage effects on soil quality	ICPA_EX1	Disk	ICPA_EX1_TR3
8. Draganesti Vlasca, RO	ICPA (18)	Compaction	soil tillage effects on soil quality	ICPA_EX1	Chisel	ICPA_EX1_TR4
9. Legnaro, IT	UNIPD (19)	Soil improving crops	TCC (Tillage and Cover Crop)	UNIPD_EX1	Ploughed, no cover crop	UNIPD_EX1_TR1
9. Legnaro, IT	UNIPD (19)	Soil improving crops	TCC (Tillage and Cover Crop)	UNIPD_EX1	Ploughed, wheat cover crop	UNIPD_EX1_TR2
9. Legnaro, IT	UNIPD (19)	Soil improving crops	TCC (Tillage and Cover Crop)	UNIPD_EX1	Ploughed, radish cover crop	UNIPD_EX1_TR3
9. Legnaro, IT	UNIPD (19)	Soil improving crops	TCC (Tillage and Cover Crop)	UNIPD_EX1	No-Till, no cover crop	UNIPD_EX1_TR4
9. Legnaro, IT	UNIPD (19)	Soil improving crops	TCC (Tillage and Cover Crop)	UNIPD_EX1	No-Till, wheat cover crop	UNIPD_EX1_TR5
9. Legnaro, IT	UNIPD (19)	Soil improving crops	TCC (Tillage and Cover Crop)	UNIPD_EX1	No-Till, radish cover crop	UNIPD_EX1_TR6
10. Szaniawy, PL	Institute of Agrophysics, Polish Academy of Sciences (20)	Fertilization/Amendments	effect of crops (leguminuous), liming and manure	IA_EX1	Control (only mineral fertilisation as in treatments)	IA_EX1_TR1
10. Szaniawy, PL	Institute of Agrophysics, Polish Academy of Sciences (20)	Fertilization/Amendments	effect of crops (leguminuous), liming and manure	IA_EX1	(L) LIMING (CaCO3 5.6 t/ha)	IA_EX1_TR2
10. Szaniawy, PL	Institute of Agrophysics, Polish Academy of Sciences (20)	Fertilization/Amendments	effect of crops (leguminuous), liming and manure	IA_EX1	(LU) COVER CROPS/ INTERCROPS – LUPINES + SERRADELLA + PHACELIA, respectively: 130 + 30 + 4 kg/ha	IA_EX1_TR3
10. Szaniawy, PL	Institute of Agrophysics, Polish Academy of Sciences (20)	Fertilization/Amendments	effect of crops (leguminuous), liming and manure	IA_EX1	(M) MANURE (30t/ha)	IA_EX1_TR4
10. Szaniawy, PL	Institute of Agrophysics, Polish Academy of Sciences (20)	Fertilization/Amendments	effect of crops (leguminuous), liming and manure	IA_EX1	(MLLU) LIMING (CaCO3 5,6 t/ha) + LUPINES + SERRADELLA + PHACELIA (130 + 30 + 4 kg/ha) + MANURE (10 t/ha)	IA_EX1_TR5
11. Caldeirão, PT	IPC/ESAC (17)	Soil improving crops	BB_Rotation System	ESAC_EX1	Organic Rice in rotation with organic lucerne	ESAC_EX1_TR1
11. Caldeirão, PT	IPC/ESAC (17)	Soil improving crops	BB_Rotation System	ESAC_EX1	Convencional Rice monoculture	ESAC_EX1_TR2
11. Caldeirão, PT	IPC/ESAC (17)	Soil improving crops	TV_Sucession System	ESAC_EX2	Maize in succession with Red Clover (Trifolium pratense)	ESAC_EX2_TR1
11. Caldeirão, PT	IPC/ESAC (17)	Soil improving crops	TV_Sucession System	ESAC_EX2	Maize in succession with Persian Clover, (Trifolium resupinatum)	ESAC_EX2_TR2
11. Caldeirão, PT	IPC/ESAC (17)	Soil improving crops	TV_Sucession System	ESAC_EX2	Maize in succession with White Lupin, (Lupinus albus)	ESAC_EX2_TR3
11. Caldeirão, PT	IPC/ESAC (17)	Soil improving crops	TV_Sucession System	ESAC_EX2	Maize in succession with Yellow Lupin, (Lupinus luteus)	ESAC_EX2_TR4
11. Caldeirão, PT	IPC/ESAC (17)	Soil improving crops	TV_Sucession System	ESAC_EX2	Maize in succession with Fallow	ESAC_EX2_TR5
11. Caldeirão, PT	IPC/ESAC (17)	Fertilization/Amendments	SS_Organic Ferlization	ESAC_EX3	Conventional Maize with Urban Sludge amendment	ESAC_EX3_TR1
11. Caldeirão, PT	IPC/ESAC (17)	Fertilization/Amendments	SS_Organic Ferlization	ESAC_EX3	Conventional Maize with Mineral amendment	ESAC_EX3_TR2
11. Caldeirão, PT	IPC/ESAC (17)	Soil improving crops	LT_Sucession System	ESAC_EX4	Maize in succession with pre-inoculated Pea, Pisum sativum L	ESAC_EX4_TR1
11. Caldeirão, PT	IPC/ESAC (17)	Soil improving crops	LT_Sucession System	ESAC_EX4	Maize in succession with pre-inoculated Red Clover, Trifolium pratense	ESAC_EX4_TR2
11. Caldeirão, PT	IPC/ESAC (17)	Soil improving crops	LT_Sucession System	ESAC_EX4	Maize in succession with pre-inoculated Yellow Lupin , Lupinus Luteus	ESAC_EX4_TR3
11. Caldeirão, PT	IPC/ESAC (17)	Soil improving crops	LT_Sucession System	ESAC_EX4	Maize in succession with pre-inoculated Balansa Clover, Trifolium Michelianum	ESAC_EX4_TR4
11. Caldeirão, PT	IPC/ESAC (17)	Soil improving crops	LT_Sucession System	ESAC_EX4	Maize in succession with non inoculated Yellow Lupin, Lupinus Luteus	ESAC_EX4_TR5
11. Caldeirão, PT	IPC/ESAC (17)	Soil improving crops	LT_Sucession System	ESAC_EX4	Maize in succession with pre-inoculated Arrowleaf Clover, Trifolium vesiculosum	ESAC_EX4_TR6
11. Caldeirão, PT	IPC/ESAC (17)	Soil improving crops	LT_Sucession System	ESAC_EX4	Maize in succession with Fallow	ESAC_EX4_TR7
12. Chania, Crete, GR	Technical University of Crete (7)	Soil cultivation -Soil improving crops	Soil erosion rate assessment	TUC_EX1	Bare soil in organic vineyards	TUC_EX1_TR1
12. Chania, Crete, GR	Technical University of Crete (7)	Soil cultivation -Soil improving crops	Soil erosion rate assessment	TUC_EX1	Cover crop (vetch) in organic vineyards	TUC_EX1_TR2
12. Chania, Crete, GR	Technical University of Crete (7)	Soil cultivation -Soil improving crops	Soil erosion rate assessment	TUC_EX1	Conventional orange orchard	TUC_EX1_TR3
12. Chania, Crete, GR	Technical University of Crete (7)	Soil cultivation -Soil improving crops	Soil erosion rate assessment	TUC_EX1	Conversion from orange orchard to avocado	TUC_EX1_TR4
12. Chania, Crete, GR	Technical University of Crete (7)	Soil cultivation -Soil improving crops	Soil erosion rate assessment	TUC_EX1	No till in organic olive orchards	TUC_EX1_TR5
12. Chania, Crete, GR	Technical University of Crete (7)	Soil cultivation -Soil improving crops	Soil erosion rate assessment	TUC_EX1	Conventional till (15-20 cm) in organic olive orchards	TUC_EX1_TR6
13. Orup, SE	Technical University of Crete (7)	Compaction	Sub soil loosening	SLU_EX1	Normal mouldboard ploughing - control	SLU_EX1_TR1
13. Orup, SE	SLU (23)	Compaction	Sub soil loosening	SLU_EX1	Sub soiling loosening	SLU_EX1_TR2
13. Orup, SE	SLU (23)	Compaction	Sub soil loosening	SLU_EX1	Sub soiling loosening with straw pellets	SLU_EX1_TR3
14. Prague-Ruzyně, CZ	Crop Research Institute (25)	Soil cultivation, Fertilization/Amendments	Tillage experiment and different N application	VURV_EX1	Conventional ploughing + No N application	VURV_EX1_TR1
14. Prague-Ruzyně, CZ	Crop Research Institute (25)	Soil cultivation, Fertilization/Amendments	Tillage experiment and different N application	VURV_EX1	Conventional ploughing +CAN	VURV_EX1_TR2
14. Prague-Ruzyně, CZ	Crop Research Institute (25)	Soil cultivation, Fertilization/Amendments	Tillage experiment and different N application	VURV_EX1	Conventional ploughing +UREA	VURV_EX1_TR3
14. Prague-Ruzyně, CZ	Crop Research Institute (25)	Soil cultivation, Fertilization/Amendments	Tillage experiment and different N application	VURV_EX1	Conventional ploughing +UREA stabil	VURV_EX1_TR4
14. Prague-Ruzyně, CZ	Crop Research Institute (25)	Soil cultivation, Fertilization/Amendments	Tillage experiment and different N application	VURV_EX1	Conventional ploughing+ CAN + urea ammonium nitrate solution	VURV_EX1_TR5
14. Prague-Ruzyně, CZ	Crop Research Institute (25)	Soil cultivation, Fertilization/Amendments	Tillage experiment and different N application	VURV_EX1	Minimum tillage + No N application	VURV_EX1_TR6
14. Prague-Ruzyně, CZ	Crop Research Institute (25)	Soil cultivation, Fertilization/Amendments	Tillage experiment and different N application	VURV_EX1	Minimum tillage +CAN	VURV_EX1_TR7
14. Prague-Ruzyně, CZ	Crop Research Institute (25)	Soil cultivation, Fertilization/Amendments	Tillage experiment and different N application	VURV_EX1	Minimum tillage +UREA	VURV_EX1_TR8
14. Prague-Ruzyně, CZ	Crop Research Institute (25)	Soil cultivation, Fertilization/Amendments	Tillage experiment and different N application	VURV_EX1	Minimum tillage +UREA stabil	VURV_EX1_TR9
14. Prague-Ruzyně, CZ	Crop Research Institute (25)	Soil cultivation, Fertilization/Amendments	Tillage experiment and different N application	VURV_EX1	Minimum tillage + CAN + urea ammonium nitrate solution	VURV_EX1_TR10
14. Prague-Ruzyně, CZ	Crop Research Institute (25)	Soil cultivation, Fertilization/Amendments	Tillage experiment and different N application	VURV_EX1	Zero tillage + No N application	VURV_EX1_TR11
14. Prague-Ruzyně, CZ	Crop Research Institute (25)	Soil cultivation, Fertilization/Amendments	Tillage experiment and different N application	VURV_EX1	Zero tillage +CAN	VURV_EX1_TR12
14. Prague-Ruzyně, CZ	Crop Research Institute (25)	Soil cultivation, Fertilization/Amendments	Tillage experiment and different N application	VURV_EX1	Zero tillage +UREA	VURV_EX1_TR13
14. Prague-Ruzyně, CZ	Crop Research Institute (25)	Soil cultivation, Fertilization/Amendments	Tillage experiment and different N application	VURV_EX1	Zero tillage +UREA stabil	VURV_EX1_TR14
14. Prague-Ruzyně, CZ	Crop Research Institute (25)	Soil cultivation, Fertilization/Amendments	Tillage experiment and different N application	VURV_EX1	Zero tillage + CAN + urea ammonium nitrate solution	VURV_EX1_TR15
15. Almeria, ES	University of Almería (26)	Soil cultivation-Soil improving crops	Aguamarga	UAL_EX1	Full Irrigation NonTillage	UAL_EX1_TR1
15. Almeria, ES	University of Almería (26)	Soil cultivation-Soil improving crops	Aguamarga	UAL_EX1	Full Irrigation weeds	UAL_EX1_TR2
15. Almeria, ES	University of Almería (26)	Soil cultivation-Soil improving crops	Aguamarga	UAL_EX1	Full Irrigation covercrops	UAL_EX1_TR3
15. Almeria, ES	University of Almería (26)	Soil cultivation-Soil improving crops	Aguamarga	UAL_EX1	Regulated Deficit Irrigation- Nontillage	UAL_EX1_TR4
15. Almeria, ES	University of Almería (26)	Soil cultivation-Soil improving crops	Aguamarga	UAL_EX1	Regulated Deficit Irrigation- weeds	UAL_EX1_TR5
15. Almeria, ES	University of Almería (26)	Soil cultivation-Soil improving crops	Aguamarga	UAL_EX1	Regulated Deficit Irrigation- covercrops	UAL_EX1_TR6
15. Almeria, ES	University of Almería (26)	Soil cultivation	Tabernas	UAL_EX2	Continuous Deficit Irrigation&Minimum Tillage	UAL_EX2_TR1
15. Almeria, ES	University of Almería (26)	Soil cultivation	Tabernas	UAL_EX2	Continuous Deficit Irrigation&Minimum Tillage plus pruning wood	UAL_EX2_TR2
15. Almeria, ES	University of Almería (26)	Soil cultivation	Tabernas	UAL_EX2	Continuous Deficit Irrigation&Minimum Tillage plus temporal cover crops	UAL_EX2_TR3
15. Almeria, ES	University of Almería (26)	Soil cultivation	Tabernas	UAL_EX2	Regulated Deficit Irrigation&Minimum Tillage	UAL_EX2_TR4
15. Almeria, ES	University of Almería (26)	Soil cultivation	Tabernas	UAL_EX2	Regulated Deficit Irrigation&Minimum Tillage plus pruning wood	UAL_EX2_TR5
15. Almeria, ES	University of Almería (26)	Soil cultivation	Tabernas	UAL_EX2	Regulated Deficit Irrigation&Minimum Tillage plus temporal cover crops	UAL_EX2_TR6
16. Brittany, FR	FRAB (27)	Soil improving crops	Wheat Early Sowing	FRAB_EX1	wheat sowing_august	FRAB_EX1_TR1
16. Brittany, FR	FRAB (27)	Soil improving crops	Wheat Early Sowing	FRAB_EX1	wheat_sowing_november	FRAB_EX1_TR2
16. Brittany, FR	FRAB (27)	Soil improving crops	Cover crops	FRAB_EX2	multispecies cover crop	FRAB_EX2_TR1
16. Brittany, FR	FRAB (27)	Soil improving crops	Cover crops	FRAB_EX2	oat cover crop	FRAB_EX2_TR2
16. Brittany, FR	FRAB (27)	Soil cultivation	Maize Direct Sowing	FRAB_EX3	direct sowing	FRAB_EX3_TR1
16. Brittany, FR	FRAB (27)	Soil cultivation	Maize Direct Sowing	FRAB_EX3	tillage sowing	FRAB_EX3_TR2

## Sheet: Metadata
	Significant change							Rating (Controll and SICS)									Method								Sociocultural
		Description	Possible values	Label	Input	Output			Description	Possible values	Label	In_Control	Out_Control	In_SICS	Out_SICS			Description	Possible values	Label	Input	Output			Column	Description	Possible values	Label input	Input	Output	Label output options	Label output		Economic Data	Selection	Values	Lables		Output value
																																		Cost-benefit		1	Positive change	2837	#N/A
	Environmental Data							Environmental Data									Environmental Data																			0	No change	Data availability	1
	Infiltration		1	Positive change	No change	0		Infiltration		1	Good	#REF!	#REF!	#REF!	#REF!		Infiltration		1	Double ring	Double ring	1														-1	Negative change
			0	No change	Data availability	1				-1	Bad								1	Beerkan method					ID	DB ID										0	No data
			-1	Negative change							No data								0	Other
			0	No data																					ciWL	Change in workload	2	Yes, workload decreased strongly	Yes, workload increased slightly	-1	Reduction of workload	Increase of workload
	Aggregate stability		1	Positive change	Negative change	-1		AggregateStability		1	Good	#REF!	#REF!	#REF!	#REF!		AggregateStability		1	Wet sieving	Wet sieving	1					1	Yes, workload decreased slightly	Data availability	1	Reduction of workload			Costs	Some uncertainties / missing data	1	High certainty / data completeness		0.9
			0	No change	Data availability	1				-1	Bad								0	Other							0	No, no change in workload			No change in workload					0.9	Some uncertainties / missing data
			-1	Negative change							No data																-1	Yes, workload increased slightly			Increase of workload					0.6	A lot of uncertainties / missing data
			0	No data																							-2	Yes, workload increased strongly			Increase of workload					0	No data
	Bulk density		1	Positive change	Positive change	1		BulkDensity		1	Good	#REF!	#REF!	#REF!	#REF!		BulkDensity		1	Core method-ISO11272	Core method-ISO11272	1					0	No data
			0	No change	Data availability	1				-1	Bad								0	Other					wLIdPT	Workload increase during peak time	-1	Yes	No	0	Workload change at peaktime	Workload change at lowtime		Benefits	High certainty / data completeness	1	High certainty / data completeness		1
			-1	Negative change							No data																0	No	Data availability	1	Workload change at lowtime					0.9	Some uncertainties / missing data
			0	No data																							-99	No data								0.6	A lot of uncertainties / missing data
	Penetration resistance		1	Positive change	No data	0		PenetrationResistance		1	Good	#REF!	#REF!	#REF!	#REF!		PenetrationResistance		1	Penetrometer Eijkelkamp	0	#N/A						Not applicable								0	No data
			0	No change	Data availability	0				-1	Bad								0	Other					R_health	Potential health risk	-1	Yes, potential health risk	No, no potential health risk	0	Potential health risk	No potential health risk
			-1	Negative change							No data																0	No, no potential health risk	Data availability	1	No potential health risk
			0	No data																							0	No data
	Mineral nitrogen		1	Positive change	No change	0		MineralNitrogen		1	Good	#REF!	#REF!	#REF!	#REF!		MineralNitrogen		1	Continuous flow analysis (ISO7150-2	Continuous flow analysis (ISO7150-2	1			R_economic	Potential economic risk	-1	Yes, potential economic risk	No, no potential economic risk	0	Potential economic risk	No potential economic risk
			0	No change	Data availability	1				-1	Bad								0	Other							0	No, no potential economic risk	Data availability	1	No potential economic risk
			-1	Negative change							No data																0	No data
			0	No data																					R_crop_failure	Potential risk of crop failure	-1	Yes, potential risk of crop failure	No, no potential risk of crop failure	0	Potential risk of crop failure	No potential risk of crop failure
	SOC		1	Positive change	No change	0		SOC		1	Good	#REF!	#REF!	#REF!	#REF!		SOC		1	Elemental analysis	Elemental analysis	1					0	No, no potential risk of crop failure	Data availability	1	No potential risk of crop failure
			0	No change	Data availability	1				-1	Bad								1	Loss on ignition							0	No data
			-1	Negative change							No data								0	Other					R_conflict	Potential risk of conflicts	-1	Yes, potential risk of conflicts	No, no potential risk of conflicts	0	Potential risk of conflicts	No potential risk of conflicts
			0	No data																							0	No, no potential risk of conflicts	Data availability	1	No potential risk of conflicts
	pH		1	Positive change	No change	0		pH		1	Good	#REF!	#REF!	#REF!	#REF!		pH		1	KCl solution	KCl solution	1					0	No data
			0	No change	Data availability	1				-1	Bad								0	Other					R_other	Potential other risks	-1	Yes, other potential risks	No, no other potential risks	0	Potential other risks	No potential other risks
			-1	Negative change							No data																0	No, no other potential risks	Data availability	1	No potential other risks
			0	No data																							0	No data
	Earthworm density		1	Positive change	No change	0		EarthwormDensity		1	Good	#REF!	#REF!	#REF!	#REF!		EarthwormDensity		1	Mustard solution	Mustard solution	1			Reput		1	Yes, farmer reputation improved	Yes, farmer reputation improved	1	Farmer reputation improved	Farmer reputation improved
			0	No change	Data availability	1				-1	Bad								0	Other							0	No, farmer reputation did not change	Data availability	1	No change in farmer reputation
			-1	Negative change							No data																-1	Yes, farmer reputation worsened			Farmer reputation worsened
			0	No data																							0	No data
	Crop yield		1	Positive change	No change	0		CropYield		1	Good	#REF!	#REF!	#REF!	#REF!		CropYield		1	Farmer information	Farmer information	1
			0	No change	Data availability	1				-1	Bad								0	Other
			-1	Negative change							No data
			0	No data
	Yield quality		1	Positive change	No change	0		YieldQuality		1	Good	#REF!	#REF!	#REF!	#REF!		YieldQuality		1	Gluten index (Mis, 2000), farinogr. Value (Järvan et al. 2017), grain hardness (SKCS)	Other	0
			0	No change	Data availability	1				-1	Bad								0	Other
			-1	Negative change							No data
			0	No data
	Crop cover characteristics		1	Positive change	Positive change	1		CropCoverCharacteristics		1	Good	#REF!	#REF!	#REF!	#REF!		CropCoverCharacteristics		1	Drone camera (Agrointelli)	Frame	1
			0	No change	Data availability	1				-1	Bad								1	Frame
			-1	Negative change							No data								0	Other
			0	No data
	Pests		1	Positive change	No data	0		Pests		1	Good	#REF!	#REF!	#REF!	#REF!		Pests		1	Farmer information	0	#N/A
			0	No change	Data availability	0				-1	Bad								0	Other
			-1	Negative change							No data
			0	No data
	Root diseases		1	Positive change	No data	0		RootDiseases		1	Good	#REF!	#REF!	#REF!	#REF!		RootDiseases		1	Excavation	0	#N/A
			0	No change	Data availability	0				-1	Bad								0	Other
			-1	Negative change							No data
			0	No data
	Weed diseases		1	Positive change	No change	0		WeedDiseases		1	Good	#REF!	#REF!	#REF!	#REF!		WeedDiseases		1	Smartphone (Agrointelli)	Other	0
			0	No change	Data availability	1				-1	Bad								0	Other
			-1	Negative change							No data
			0	No data
	Variable	Significant Change	Method	Data
	Infiltration	0	1	1
	Aggregate stability	-1	1	1
	Bulk density	1	1	1
	Penetration resistance	0	#N/A	0
	Mineral nitrogen	0	1	1
	SOC	0	1	1
	pH	0	1	1
	Earthworm density	0	1	1
	Crop yield	0	1	1
	Yield quality	0	0	1
	Crop cover characteristics	1	1	1
	Pests	0	#N/A	0
	Root diseases	0	#N/A	0
	Weed diseases	0	0	1
	Positive change						Infiltration; Aggregate stability; Bulk density; Penetration resistance; Mineral nitrogen; SOC; pH; Earthworm density; Crop yield; Yield quality; Crop cover characteristics; Pests; Root diseases; Weed diseases
	Bulk density
	Crop cover characteristics

## Sheet: DrawbacksBenefits
	Benefits	Bulk density; Crop cover characteristics; Farmer reputation improved; Benefits;
	Drawbacks	Aggregate stability; Increase of workload; Cost-benefit; Costs;
	Environmental dimension			Sociocultural dimension
#	Positive change	Negatve change		Variable	Positive	Negative
1	Bulk density	Aggregate stability		Change in workload		Increase of workload							variable	Input	Method	Data availability		helper_neg	helper_pos
2	Crop cover characteristics												Infiltration	0	1	1		0	0
3				Potential health risk	No potential health risk								Aggregate stability	-1	1	1		0	1
4				Potential economic risk	No potential economic risk								Bulk density	1	1	1		1	1
5				Potential risk of crop failure	No potential risk of crop failure								Penetration resistance	0	#N/A	0		1	1
6				Potential risk of conflicts	No potential risk of conflicts								Mineral nitrogen	0	1	1		1	1
7				Potential other risks	No potential other risks								SOC	0	1	1		1	1
8													pH	0	1	1		1	1
9				Farmer reputation	Farmer reputation improved								Earthworm density	0	1	1		1	1
10													Crop yield	0	1	1		1	1
11													Yield quality	0	0	1		1	1
12													Crop cover characteristics	1	1	1		2	1
13													Pests	0	#N/A	0		2	1
14													Root diseases	0	#N/A	0		2	1
15													Weed diseases	0	0	1		2	1
16
17
18
19													ct_neg	2
20													ct_pos	1
21
22
23
24
25				Socio-economic
26				Variable	Positive	Negative	Neutral
27				Cost-benefit		Cost-benefit
28				Costs		Costs
29				Benefits	Benefits
30
31
32				Cost-benefit	Negative
				Cost	Negative
				Benefit	Positive

## Sheet: Clusters
	Define the variable weight for each cluster									Identify the differences between the clusters when looking at the aggregation weights
	Variable	WeighInSoilcultivation	WeighInFertilisation	WeighInSoilImprovingCrops	WeighInCompaction	SignificantChange	RatingMeasMeth	DataAvailability		StdDev	Mean		WeighInSoilcultivation	WeighInFertilisation	WeighInSoilImprovingCrops	WeighInCompaction
	Infiltration	0.05	0.01	0.05	0.15	0	1	1		0.0517204	0.065		-0.290021	-1.06341	-0.290021	1.64345
	AggregateStability	0	0.01	0.05	0.1	-1	1	1		0.03937	0.04		-1.016	-0.762001	0.254	1.524
	BulkDensity	0.08	0.01	0.05	0.2	1	1	1		0.0708872	0.085		-0.0705346	-1.05802	-0.493742	1.62229
	PenetrationResistance	0	0	0	0.2	0	#N/A	0		0.0866025	0.05		-0.57735	-0.57735	-0.57735	1.73205
	MineralNitrogen	0.05	0.22	0.05	0.05	0	1	1		0.0736122	0.0925		-0.57735	1.73205	-0.57735	-0.57735
	SOC	0.05	0.3	0.05	0.05	0	1	1		0.108253	0.1125		-0.57735	1.73205	-0.57735	-0.57735
	pH	0.02	0.05	0.05	0.05	0	1	1		0.0129904	0.0425		-1.73205	0.57735	0.57735	0.57735
	EarthwormDensity	0.05	0.05	0.05	0.05	0	1	1		0	0.05		#NUM!	#NUM!	#NUM!	#NUM!
	CropYield	0.2	0.05	0.1	0.05	0	1	1		0.0612372	0.1		1.63299	-0.816497	2.26623e-16	-0.816497
	YieldQuality	0.1	0.1	0.1	0.05	0	0	1		0.0216506	0.0875		0.57735	0.57735	0.57735	-1.73205
	CropCoverCharacteristics	0.25	0.05	0.1	0.05	1	1	1		0.081968	0.1125		1.67748	-0.762493	-0.152499	-0.762493
	Pests	0.05	0.05	0.2	0	0	#N/A	0		0.075	0.075		-0.333333	-0.333333	1.66667	-1
	RootDiseases	0.05	0.05	0.1	0	0	#N/A	0		0.0353553	0.05		0	0	1.41421	-1.41421
	WeedDiseases	0.05	0.05	0.05	0	0	0	1		0.0216506	0.0375		0.57735	0.57735	0.57735	-1.73205
	Check sum	1	1	1	1
	Calculate the weighted average for obtaining an index for each cluster								Measurment	Data
		Soil cultivation	Fertilisation	SoilImprovingCrops	Compaction			Nbr of measurments	11	14
	Sustainability Index	0.33	0.05	0.1	0.15			Nbr of applied recommended methods	9	11
	Measurment Method Index	#N/A	#N/A	#N/A	#N/A			Share	0.818182	0.785714
	Data input index	0.9	0.9	0.7	0.8

## Sheet: Properties
	Define the variable weight for each property								Identify the differences between the clusters when looking at the aggregation weights
	Variable	WeighInPhysical	WeighInChemical	WeighInBiological	SignificantChange	RatingMeasMeth	DataAvailability		StdDev	Mean		WeighInPhysical	WeighInChemical	WeighInBiological
	Infiltration	0.05	0.01	0.05	0	1	1		0.0188562	0.0366667		0.707107	-1.41421	0.707107
	AggregateStability	0	0.01	0.05	-1	1	1		0.0216025	0.02		-0.92582	-0.46291	1.38873
	BulkDensity	0.08	0.01	0.05	1	1	1		0.0286744	0.0466667		1.16248	-1.27872	0.116248
	PenetrationResistance	0	0	0	0	0	0		0	0		#NUM!	#NUM!	#NUM!
	MineralNitrogen	0.05	0.22	0.05	0	1	1		0.0801388	0.106667		-0.707107	1.41421	-0.707107
	SOC	0.05	0.3	0.05	0	1	1		0.117851	0.133333		-0.707107	1.41421	-0.707107
	pH	0.02	0.05	0.05	0	1	1		0.0141421	0.04		-1.41421	0.707107	0.707107
	EarthwormDensity	0.05	0.05	0.05	0	1	1		6.93889e-18	0.05		-1	-1	-1
	CropYield	0.2	0.05	0.1	0	1	1		0.062361	0.116667		1.33631	-1.06904	-0.267261
	YieldQuality	0.1	0.1	0.1	0	1	1		1.38778e-17	0.1		-1	-1	-1
	CropCoverCharacteristics	0.25	0.05	0.1	1	1	1		0.0849837	0.133333		1.37281	-0.980581	-0.392232
	Pests	0.05	0.05	0.2	0	0	0		0.0707107	0.1		-0.707107	-0.707107	1.41421
	RootDiseases	0.05	0.05	0.1	0	0	0		0.0235702	0.0666667		-0.707107	-0.707107	1.41421
	WeedDiseases	0.05	0.05	0.05	0	1	1		6.93889e-18	0.05		-1	-1	-1
	Check sum	1	1	1
	Calculate the weighted average for obtaining an index for each cluster
		Physical properties	Chemical properties	Biological properties
	Sustainability Index	0.33	0.05	0.1
	Measurment Method Index	0.9	0.9	0.7
	Data input index	0.9	0.9	0.7

## Sheet: Soilquality
	Define the variable weight for each cluster
	Variable	WeightSoilquality	SignificantChange	RatingMeasMeth	DataAvailability
	Infiltration	0.0714286	0	1	1
	AggregateStability	0.0714286	-1	1	1
	BulkDensity	0.0357143	1	1	1
	PenetrationResistance	0.0357143	0	#N/A	0
	MineralNitrogen	0.0714286	0	1	1
	SOC	0.0714286	0	1	1
	pH	0.0714286	0	1	1
	EarthwormDensity	0.0714286	0	1	1
	CropYield	0.5	0	1	1
	YieldQuality	0	0	0	1
	CropCoverCharacteristics	0	1	1	1
	Pests	0	0	#N/A	0
	RootDiseases	0	0	#N/A	0
	WeedDiseases	0	0	0	1
	Check sum	1
	Calculate the weighted average for obtaining an index for each cluster
		SoilQuality
	Sustainability Index	-0.0357143
	Measurment Method Index	#N/A
	Data input index	0.964286

## Sheet: EnvironmentalDimension
		Define table with aggregation weights								Get the imput values
		Proposed clustering	SoilCultivation	Fertilisation	SoilImprovingCrops	Compaction		Checksum		Variable	Entry
		Fertilization/Amendments	0.3	0.3	0.3	0.1		1		Propose clustering	Soil improving crops
		Soil cultivation	0.5	0.1	0.2	0.2		1
		Compaction	0.2	0.1	0.3	0.4		1
		Soil improving crops	0.1	0.2	0.5	0.2		1
										Get aggregation weights for each cluster
										Variable	Weight
										SoilCultivation	0.1
										Fertilisation	0.2
										SoilImprovingCrops	0.5
										Compaction	0.2
										Checksum	1
										Get cluster values
										Variable	Sustainability Index	Mesuremt Method Index	Data input index
										SoilCultivation	0.33	#N/A	0.9
										Fertilisation	0.05	#N/A	0.9
										SoilImprovingCrops	0.1	#N/A	0.7
										Compaction	0.15	#N/A	0.8
										Calculate Index for Envrinomental Dimension
										EnvironmentalDimension	0.123	#N/A	0.78

[truncated: 6 more sheets: EconomicDimension, Workload, PercievedRisks, SocioculturalDimension, OverallSustainability, Change log]
