# Supplementary material
Source: MDPI journal article supplement (https://www.mdpi.com/2073-445X/11/5/729)
Supplement: s1 [file s1 › Supplementary Material File S2.xlsx]

## Sheet: General information
				S2 - Excel Tool to assess economic dimension
Authors:		Luuk Fleskens(1) & Abdallah Alaoui(2)
		The economic dimension was assessed by evaluating the costs and benefits of the farm using a spreadsheet formatted questionnaire to ensure ease of use. This question-naire, adapted from *Fleskens L et al. (2018), contained the different types of costs, such as investment costs, maintenance costs, production costs, and benefits related to both the control and the SICS fields.
		(1)Soil Physics and Land Management Group, Wageningen University, Droevendaalsesteeg 3, 6708 PB, Wageningen, Netherlands; luuk.fleskens@wur.nl
		(2)Institute of Geography, University of Bern, Hallerstrasse 12, 3012 Bern, Switzerland; abdallah.alaoui@giub.unibe.ch
Reference:		Fleskens L, Gaaff M, Verzandvoort S, Irvine B, 2018. Model assessments of the cost- effectiveness of prevention/ remediation/ restoration measures for all Case Study areas. RECARE Deliverable 7.2. Available at: https://www.recare-hub.eu/images/WP7/RECARE_REPORT_29_D72_final.pdf

## Sheet: Overview
		Monitoring costs and benefits of the SICS adoption
		Overview
		Country:			Germany
		SS number:			5
		Contact person:			Moritz Hallama (and Mara Bonney)
		Define the specific area where the SICS is implemented and where the costs and benefits are known
		If costs are calculated per area, indicate unit:				ha		and size:	1
		Examples: unit: hectare, size: 2.5 or unit: acre, size: 50, etc.
		If using a local area unit, indicate conversion factor to one hectare:
		“+2” if the area considered is 2x larger, and “-2” if the area is 2x smaller
		If costs are not calculated per area, indicate unit:						and size:
		Examples: unit: dam, terrace wall, grass strip, drainage ditch, etc., size: volume of dam 30’000 m3, length of terrace wall 250 m etc.
		If using national currency other than Euro, indicate name:
		Euro will be the default currency if nothing is filled in here

## Sheet: SICS
		SICS overview	This section describes the required information on the SICS (crop_SICS, AMT_SICS) and the control system (crop_control, AMT_control)
		Crop rotation (SICS)	winter wheat,cover crops, silo maize, winter wheat
		Crop rotation (control)	winter wheat, silo maize, winter wheat
		The SICS addresses:
		i) Primary soil threat (specify)	compaction, biodiversity loss, erosion, SOM decline
		ii) Soil quality in general	yes
			crop_control		crop_SICS
		Crop type:	Mulch sowing without catch crop (MSoCC/MSoZF)		Mulch sowing with catch crop (MSwCC/MSmZF)
			AMT_control		AMT_SICS
		Agr. management technique, AMT	Mulch sowing		Mulch sowing
		Crop description	After winter wheat in the first year, NO catch crop will be established, in the following spring (second year) the maize will be sown and in the further season (third year) winter wheat will be sown again. There is no ploughing before sowing. The soil is only worked on the surface to a maximum depth of 15 cm (with the cultivator).		After winter wheat in the first year, a catch crop with at least 5 components will be established, in the following spring (second year) the maize will be sown and in the further season (third year) winter wheat will be sown again. There is no ploughing before sowing. The soil is only worked on the surface to a maximum depth of 15 cm (with the cultivator).
		Brief description
			Without SICS
		Is the technology expected to lead to the following, next to addressing soil quality:
		Several answers possible (yes/no/specify if necessary)
		- Improve production (crops, fodder, wood/fibre, water, energy)			yes by better soil quality and less compaction
		- Address other soil threats (mention threats, e.g. OM decline)			less wind and water erosion
		- Reduce risk of natural disasters (e.g. droughts, land slides, etc.)			no
		- Adapt to climate change and its impacts			Yes, better water retention capacity in droughts, less loss of valuable topsoil due to intense rainfall events.
		- Economic impact (e.g. increase income/employment opp.)			Reduced workload
		- Social impact (e.g. reduce conflicts on natural resources)			no
		- Other impact (specify):
		Technical details of treatment
		refer to any aspects that applies
		- Dimensions (heigth, depth, width, length) of structures and vegetative elements					Use of an average tractor with 67 - 138 kW depending on the working method and machines with an average working width of 3 - 6 m, as usual in Germany.
		- Spacing between structures or plants/vegetative measures					row distance winter wheat 17,5cm, row distance Maize 30cm
		- Vertical intervals structures or vegetative measures					does not exist
		- Slope angle (before and after implementation of SLM technology)					does not exist
		- Lateral gradient of structure					does not exist
		- Capacity of dams, ponds, etc.					does not exist
		- Catchment area and beneficial area of dams, ponds, other water harvesting systems					does not exist
		- Construction materials used					Cultivator, Rotary harrow/seed drill combination
		- Species used					Seed mixture intermediate crops (5 components), winter wheat, maize
		- Quantity/density of plants (per ha)					Winter wheat crop coverage: 58.8 % and 62.5 % in SICS. No data available for maize.

## Sheet: Investment costs
		List of establishment activities for the SICS and the control cropping system
		Always indicate the crop number each entry refers to
		Period (X to Y)		Cropping syst.		Activity		Labour (paid or voluntary)					Equipment (tools, machine hours, animal traction, etc)					Agricultural inputs (seeds, fertilizer, etc.)				Construction material (stones, wood, earth, sand, etc.)					Other					SUM
		dd-m-yy to dd-m-yy						Description	Unit	Unit price	Quantity		Description	Unit	Unit price	Quantity		Description	Unit	Quantity		Description	Unit	Unit price	Quantity		Description	Unit	Unit price	Quantity
MSoCC	WW	2014-10-14		Crop_control		Cultivate the soil deep		cultivate	€/h	20	2.14		Depreciation and interest expenses	€/ha	16.45	2																75.7		Crop_control
MSoCC	WW			Crop_control		Mulch sowing		sowing	€/h	20	0.91		Depreciation and interest expenses	€/ha	24.92	1																43.12
MSoCC	WW			Crop_control		Phytosanitary treatment		pest control	€/h	20	0.66		Depreciation and interest expenses	€/ha	4.67	1																17.87
MSoCC	WW			Crop_control		Fertilizer spread		fertilize	€/h	20	0.57		Depreciation and interest expenses	€/ha	5.3	3																27.3		Crop_SICS
MSoCC	WW			Crop_control		Harvest		harvesting	€/h	20	1.32		Depreciation and interest expenses	€/ha	122.1	1																148.5
MSoCC	WW			Crop_control		Grain skimming		transport	€/h	20	2.23		Depreciation and interest expenses	€/ha	8.49	1																53.09
MSoCC	Maize			Crop_control		Cultivate the soil deep		cultivate	€/h	20	1.07		Depreciation and interest expenses	€/ha	16.45	1						Interest rate for current assets	€/ha	12	1							49.85
MSoCC	Maize			Crop_control		Rotary harrow		cultivate	€/h	20	2.36		Depreciation and interest expenses	€/ha	18.51	2																84.22
MSoCC	Maize			Crop_control		Single seeding maize		sowing	€/h	20	0.7		Depreciation and interest expenses	€/ha	29.12	1																43.12
MSoCC	Maize			Crop_control		Phytosanitary treatment		pest control	€/h	20	0.22		Depreciation and interest expenses	€/ha	4.67	1																9.07
MSoCC	Maize			Crop_control		Fertilizer spread		fertilize	€/h	20	0.38		Depreciation and interest expenses	€/ha	5.3	2																18.2
MSoCC	Maize			Crop_control		Harvest		harvesting	€/h	20	0		Depreciation and interest expenses	€/ha	0	1																0
MSoCC	WW			Crop_control		Cultivate the soil deep		cultivate	€/h	20	2.14		Depreciation and interest expenses	€/ha	16.45	1						Interest rate for current assets	€/ha	9	1							68.25
MSoCC	WW			Crop_control		Mulch sowing		sowing	€/h	20	0.91		Depreciation and interest expenses	€/ha	24.92	1																43.12
MSoCC	WW			Crop_control		Phytosanitary treatment		pest control	€/h	20	0.66		Depreciation and interest expenses	€/ha	4.67	1																17.87
MSoCC	WW			Crop_control		Fertilizer spread		fertilize	€/h	20	0.57		Depreciation and interest expenses	€/ha	5.3	1																16.7
MSoCC	WW	2016-08-11		Crop_control		Harvest		harvesting	€/h	20	1.32		Depreciation and interest expenses	€/ha	122.1	1																148.5
		2016-08-11		Crop_control		Grain skimming		transport	€/h	20	2.23		Depreciation and interest expenses	€/ha	8.49	1						Interest rate for current assets	€/ha	12	1							65.09
																																0
																																0
MSwCC	WW	2014-10-14		Crop_SICS		Cultivate the soil deep		cultivate	€/h	20	2.14		Depreciation and interest expenses	€/ha	16.45	2																75.7
MSwCC	WW			Crop_SICS		Mulch sowing		sowing	€/h	20	0.91		Depreciation and interest expenses	€/ha	24.92	1																43.12
MSwCC	WW			Crop_SICS		Phytosanitary treatment		pest control	€/h	20	0.66		Depreciation and interest expenses	€/ha	4.67	1																17.87
MSwCC	WW			Crop_SICS		Fertilizer spread		fertilize	€/h	20	0.57		Depreciation and interest expenses	€/ha	5.3	3																27.3
MSwCC	WW			Crop_SICS		Harvest		harvesting	€/h	20	1.32		Depreciation and interest expenses	€/ha	122.1	1																148.5
MSwCC	WW			Crop_SICS		Grain skimming		transport	€/h	20	2.23		Depreciation and interest expenses	€/ha	8.49	1						Interest rate for current assets	€/ha	12	1							65.09
MSwCC	CC			Crop_SICS		Cultivate the soil deep		cultivate	€/h	20	2.14		Depreciation and interest expenses	€/ha	16.45	1																59.25
MSwCC	CC			Crop_SICS		Sowing combination		sowing	€/h	20	1.16		Depreciation and interest expenses	€/ha	23.68	1																46.88
MSwCC	Maize			Crop_SICS		Cultivate the soil deep		cultivate	€/h	20	1.07		Depreciation and interest expenses	€/ha	16.45	1																37.85
MSwCC	Maize			Crop_SICS		Rotary harrow		cultivate	€/h	20	2.36		Depreciation and interest expenses	€/ha	18.51	2																84.22
MSwCC	Maize			Crop_SICS		Single seeding maize		sowing	€/h	20	0.7		Depreciation and interest expenses	€/ha	29.12	1																43.12
MSwCC	Maize			Crop_SICS		Phytosanitary treatment		pest control	€/h	20	0.22		Depreciation and interest expenses	€/ha	4.67	1																9.07
MSwCC	Maize			Crop_SICS		Fertilizer spread		fertilize	€/h	20	0.38		Depreciation and interest expenses	€/ha	5.3	2																18.2
MSwCC	Maize			Crop_SICS		Harvest		harvesting	€/h	20	0		Depreciation and interest expenses	€/ha	0	1																0
MSwCC	WW			Crop_SICS		Cultivate the soil deep		cultivate	€/h	20	2.14		Depreciation and interest expenses	€/ha	16.45	1						Interest rate for current assets	€/ha	9	1							68.25
MSwCC	WW			Crop_SICS		Mulch sowing		sowing	€/h	20	0.91		Depreciation and interest expenses	€/ha	24.92	1																43.12
MSwCC	WW			Crop_SICS		Phytosanitary treatment		pest control	€/h	20	0.66		Depreciation and interest expenses	€/ha	4.67	1																17.87
MSwCC	WW			Crop_SICS		Fertilizer spread		fertilize	€/h	20	0.57		Depreciation and interest expenses	€/ha	5.3	1																16.7
MSwCC	WW	2016-08-11		Crop_SICS		Harvest		harvesting	h	20	1.32		Depreciation and interest expenses	€/ha	122.1	1																148.5
MSwCC	WW	2016-08-11		Crop_SICS		Grain skimming		transport	h	20	2.23		Depreciation and interest expenses	€/ha	8.49	1						Interest rate for current assets	€/ha	12	1							65.09
																																		AMT_SICS
		Notes:
		Costs and inputs specified in this question should refer to the area/unit defined in the Overview worksheet
		List here all one-off investment costs; if it is known that activities need to be performed multiple times over the course of the lifetime of the SICS, include on Worksheet maintenance costs
		An activity refers to a defined task need to establish the SICS (for each crop) and may consist of multiple inputs:
		- Labour costs indicate total person days, either paid or voluntary.
		- Equipment includes tools, machine hours, animal traction, etc. Cost calculation for machine hours should be based on hiring costs – even if the machinery is owned by the land user.
		- Agricultural inputs include seeds, seedling, fertilizer, biocides, compost/manure, etc. and indicate quantities needed
		- Construction material includes stones, wood, earth, sand, etc. and indicate quantities needed

## Sheet: Maintenance costs
		List of maintenance/recurrent activities for the SICS and the control cropping systeminvolved
		Always indicate the treatment each entry refers to
		Period (X to Y)		Cropping syst.		Activity		Labour (paid or voluntary)					Equipment (tools, machine hours, animal traction, etc)					Agricultural inputs (seeds, fertilizer, etc.)				Construction material (stones, wood, earth, sand, etc.)					Other					SUM
		dd-m-yy to dd-m-yy						Description	Unit	Unit price	Quantity		Description	Unit	Unit price	Quantity		Description	Unit	Quantity		Description	Unit	Unit price	Quantity		Description	Unit	Unit price	Quantity
MSoCC	WW	2014-10-14		Crop_control		Cultivate the soil deep							cultivate	€/ha	13.71	2																27.42
MSoCC	WW			Crop_control		Mulch sowing							sowing	€/ha	14.42	1																14.42		Crop_control
MSoCC	WW			Crop_control		Phytosanitary treatment							pest control	€/ha	2.2	1																2.2		AMT_control
MSoCC	WW			Crop_control		Fertilizer spread							fertilize	€/ha	2.18	3																6.54
MSoCC	WW			Crop_control		Harvest							harvesting	€/ha	24.91	1																24.91
MSoCC	WW			Crop_control		Grain skimming							transport	€/ha	5.74	1																5.74
MSoCC	Maize			Crop_control		Cultivate the soil deep							cultivate	€/ha	13.71	1																13.71
MSoCC	Maize			Crop_control		Rotary harrow							cultivate	€/ha	16.64	2																33.28
MSoCC	Maize			Crop_control		Single seeding maize							sowing	€/ha	12.31	1																12.31
MSoCC	Maize			Crop_control		Phytosanitary treatment							pest control	€/ha	2.2	1																2.2
MSoCC	Maize			Crop_control		Fertilizer spread							fertilize	€/ha	2.18	2																4.36
MSoCC	Maize			Crop_control		Harvest							harvesting	€/ha	0	1																0
MSoCC	WW			Crop_control		Cultivate the soil deep							cultivate	€/ha	13.71	1																13.71
MSoCC	WW			Crop_control		Mulch sowing							sowing	€/ha	14.42	1																14.42
MSoCC	WW			Crop_control		Phytosanitary treatment							pest control	€/ha	2.2	1																2.2
MSoCC	WW			Crop_control		Fertilizer spread							fertilize	€/ha	2.18	1																2.18
MSoCC	WW	2016-08-11		Crop_control		Harvest							harvesting	€/ha	40.27	1																40.27
		2016-08-11		Crop_control		Grain skimming							transport	€/ha	5.74	1																5.74
														€/ha																		0
														€/ha																		0
MSwCC	WW	2014-10-14		Crop_SICS		Cultivate the soil deep							cultivate	€/ha	13.71	2																27.42
MSwCC	WW			Crop_SICS		Mulch sowing							sowing	€/ha	14.42	1																14.42
MSwCC	WW			Crop_SICS		Phytosanitary treatment							pest control	€/ha	2.2	1																2.2
MSwCC	WW			Crop_SICS		Fertilizer spread							fertilize	€/ha	2.18	3																6.54
MSwCC	WW			Crop_SICS		Harvest							harvesting	€/ha	24.91	1																24.91
MSwCC	WW			Crop_SICS		Grain skimming							transport	€/ha	5.74	1																5.74
MSwCC	CC			Crop_SICS		Cultivate the soil deep							cultivate	€/ha	13.71	1																13.71
MSwCC	CC			Crop_SICS		Sowing combination							sowing	€/ha	19	1																19
MSwCC	Maize			Crop_SICS		Cultivate the soil deep							cultivate	€/ha	13.71	1																13.71
MSwCC	Maize			Crop_SICS		Rotary harrow							cultivate	€/ha	16.64	2																33.28
MSwCC	Maize			Crop_SICS		Single seeding maize							sowing	€/ha	12.31	1																12.31
MSwCC	Maize			Crop_SICS		Phytosanitary treatment							pest control	€/ha	2.2	1																2.2
MSwCC	Maize			Crop_SICS		Fertilizer spread							fertilize	€/ha	2.18	2																4.36
MSwCC	Maize			Crop_SICS		Harvest							harvesting	€/ha	0	1																0
MSwCC	WW			Crop_SICS		Cultivate the soil deep							cultivate	€/ha	13.71	1																13.71
MSwCC	WW			Crop_SICS		Mulch sowing							sowing	€/ha	14.42	1																14.42
MSwCC	WW			Crop_SICS		Phytosanitary treatment							pest control	€/ha	2.2	1																2.2
MSwCC	WW			Crop_SICS		Fertilizer spread							fertilize	€/ha	2.18	1																2.18
MSwCC	WW	2016-08-11		Crop_SICS		Harvest							harvesting	€/ha	40.27	1																40.27
MSwCC	WW	2016-08-11		Crop_SICS		Grain skimming							transport	€/ha	5.74	1																5.74
																																		Crop_SICS
																																		AMT_SICS
		Notes:
		An activity refers to a defined task needed to establish (part of) the SICS and may consist of multiple inputs:
		>> Labour costs indicate total person days, either paid or voluntary.
		>> Equipment includes tools, machine hours, animal traction, etc. Cost calculation for machine hours should be based on hiring costs, even if the machinery is owned by the land user.
		>> Agricultural inputs include seeds, seedlings, fertilizers, biocides, compost/manure, etc. Please indicate the quantities needed.
		>> Construction materials include stones, wood, earth, sand, etc. Please indicate the quantities needed.

## Sheet: Production costs
		List of changes in production costs relating to the SICS and the control cropping system
		Always indicate the treatment each entry refers to
		Period (X to Y)		Crop		Activity		Labour (paid or voluntary)					Equipment (tools, machine hours, animal traction, etc)					Agricultural inputs (seeds, fertilizer, etc.)				Construction material (stones, wood, earth, sand, etc.)					Other					SUM
		dd-m-yy to dd-m-yy						Description	Unit	Unit price	Quantity		Description	Unit	Unit price	Quantity		Description	Unit	Quantity		Description	Unit	Unit price	Quantity		Description	Unit	Unit price	Quantity
MSoCC	WW	2014-10-14		Crop_control		Cultivate the soil deep							cultivate	€/ha	10.47	2																20.94
MSoCC	WW			Crop_control		Mulch sowing							sowing	€/ha	8.58	1		Seeds in €/ha	99	1												107.58		Crop_control
MSoCC	WW			Crop_control		Phytosanitary treatment							pest control	€/ha	1.04	1		Pesticides/fungicides/herbicides in €/ha	260	1												261.04		AMT_control
MSoCC	WW			Crop_control		Fertilizer spread							fertilize	€/ha	1.08	3		Fertilizer in €/ha	176	1												179.24
MSoCC	WW			Crop_control		Harvest							harvesting	€/ha	17.14	1						Costs for hail insurance		15	1							32.14
MSoCC	WW			Crop_control		Grain skimming							transport	€/ha	5.19	1						Drying costs		54	1							59.19
MSoCC	Maize			Crop_control		Cultivate the soil deep							cultivate	€/ha	10.47	1																10.47
MSoCC	Maize			Crop_control		Rotary harrow							cultivate	€/ha	9.48	2																18.96
MSoCC	Maize			Crop_control		Single seeding maize							sowing	€/ha	2.18	1		Seeds in €/ha	159	1												161.18
MSoCC	Maize			Crop_control		Phytosanitary treatment							pest control	€/ha	1.04	1		Pesticides/fungicides/herbicides in €/ha	82	1												83.04
MSoCC	Maize			Crop_control		Fertilizer spread							fertilize	€/ha	1.08	2		Fertilizer in €/ha	321	1		Costs for hail insurance	€/ha	15	1							338.16
MSoCC	Maize			Crop_control		Harvest							harvesting	€/ha	0	1						Drying costs	€/ha	0	1							0
MSoCC	WW			Crop_control		Cultivate the soil deep							cultivate	€/ha	10.47	1																10.47
MSoCC	WW			Crop_control		Mulch sowing							sowing	€/ha	8.58	1		Seeds in €/ha	99	1												107.58
MSoCC	WW			Crop_control		Phytosanitary treatment							pest control	€/ha	1.04	1		Pesticides/fungicides/herbicides in €/ha	260	1												261.04
MSoCC	WW			Crop_control		Fertilizer spread							fertilize	€/ha	1.08	1		Fertilizer in €/ha	176	1		Costs for hail insurance	€/ha	18	1							195.08
MSoCC	WW	2016-08-11		Crop_control		Harvest							harvesting	€/ha	21.06	1						Drying costs	€/ha	70	1							91.06
		2016-08-11		Crop_control		Grain skimming							transport	€/ha	5.19	1																5.19
																																0
																																0
MSwCC	WW	2014-10-14		Crop_SICS		Cultivate the soil deep							cultivate	€/ha	10.47	2																20.94
MSwCC	WW			Crop_SICS		Mulch sowing							sowing	€/ha	8.58	1		Seeds in €/ha	99	1												107.58
MSwCC	WW			Crop_SICS		Phytosanitary treatment							pest control	€/ha	1.04	1		Pesticides/fungicides/herbicides in €/ha	260	1												261.04
MSwCC	WW			Crop_SICS		Fertilizer spread							fertilize	€/ha	1.08	3		Fertilizer in €/ha	195	1		Costs for hail insurance	€/ha	17	1							215.24
MSwCC	WW			Crop_SICS		Harvest							harvesting	€/ha	17.14	1						Drying costs	€/ha	60	1							77.14
MSwCC	WW			Crop_SICS		Grain skimming							transport	€/ha	5.19	1																5.19
MSwCC	CC			Crop_SICS		Cultivate the soil deep							cultivate	€/ha	10.47	1																10.47
MSwCC	CC			Crop_SICS		Sowing combination							sowing	€/ha	15.05	1		Seeds in €/ha	75.35	1												90.4
MSwCC	Maize			Crop_SICS		Cultivate the soil deep							cultivate	€/ha	10.47	1																10.47
MSwCC	Maize			Crop_SICS		Rotary harrow							cultivate	€/ha	9.48	2																18.96
MSwCC	Maize			Crop_SICS		Single seeding maize							sowing	€/ha	2.18	1		Seeds in €/ha	159	1												161.18
MSwCC	Maize			Crop_SICS		Phytosanitary treatment							pest control	€/ha	1.04	1		Pesticides/fungicides/herbicides in €/ha	82	1												83.04
MSwCC	Maize			Crop_SICS		Fertilizer spread							fertilize	€/ha	1.08	2		Fertilizer in €/ha	333	1		Costs for hail insurance	€/ha	15	1							350.16
MSwCC	Maize			Crop_SICS		Harvest							harvesting	€/ha	0	1						Drying costs	€/ha	0	1							0
MSwCC	WW			Crop_SICS		Cultivate the soil deep							cultivate	€/ha	10.47	1																10.47
MSwCC	WW			Crop_SICS		Mulch sowing							sowing	€/ha	8.58	1		Seeds in €/ha	99	1												107.58
MSwCC	WW			Crop_SICS		Phytosanitary treatment							pest control	€/ha	1.04	1		Pesticides/fungicides/herbicides in €/ha	188	1												189.04
MSwCC	WW			Crop_SICS		Fertilizer spread							fertilize	€/ha	1.08	1		Fertilizer in €/ha	234	1		Costs for hail insurance	€/ha	19	1							254.08
MSwCC	WW	2016-08-11		Crop_SICS		Harvest							harvesting	€/ha	21.06	1						Drying costs	€/ha	72	1							93.06
MSwCC	WW	2016-08-11		Crop_SICS		Grain skimming							transport	€/ha	5.19	1																5.19
																																		Crop_SICS
																																		AMT_SICS
		Notes:
		Costs and inputs specified in Table 7 should refer to the area/unit defined in the overview worksheet (Section 2.3.1). List here all production costs pertaining to activities or inputs related to activities that have changed as a consequence of introducing a SICS (or a crop). Recurrent costs related to the technology itself should be recorded under maintenance costs (Section 2.3.4: maintenance co…
		An activity refers to a defined task needed to establish (part of) the SICS and may consist of multiple inputs:
		>> Labour costs indicate total person days, either paid or voluntary.
		>> Equipment includes tools, machine hours, animal traction, etc. Cost calculation for machine hours should be based on hiring costs, even if the machinery is owned by the land user.
		>> Agricultural inputs include seeds, seedlings, fertilizers, biocides, compost/manure, etc. Please indicate the quantities needed.
		>> Construction materials include stones, wood, earth, sand, etc. Please indicate the quantities needed.

## Sheet: Equipment costs
		List of pieces of equipment required for the SICS that are not usually required in the control cropping system
		Always indicate the treatment each entry refers to
		Crop		Activity		Equipment (tools, machine hours, animal traction, etc)					Estimated economic life		Comments		SUM
						Description	Unit	Unit price	Quantity		(years)
													There is no		0		Crop_control
															0		AMT_control
															0
															0		Crop_SICS
																	AMT_SICS
		Notes:
		List here all pieces of equipment required for each of the treatments that is not usually required in the without case (i.e. control conditions)
		Include the price for these pieces of equipment, regardless of whether in the experimental case the equipment was not actually purchased

## Sheet: Benefits
		List of benefits recorded for the SICS and for the control cropping system
		Always indicate the crop each entry refers to; note benefits may differ per crop, and multiple benefits can be recorded
		Period (X to Y)		Crop		Product / service					Type of price*		Comment			SUM
		dd-m-yy to dd-m-yy				Description	Unit	Unit price	Quantity
				Crop_control		Yield performance	€/ha	2837	1		market price		The yield performance (for the entire crop rotation) is calculated from the yield*market price. Since the straw is left in the field, it is the pure grain yield (or silage maize yield) multiplied by the average market price in the respective year.			2837		Crop_control
																0		AMT_control
				Crop_SICS		Yield performance	€/ha	2999	1		market price		The yield performance (for the entire crop rotation) is calculated from the yield*market price. Since the straw is left in the field, it is the pure grain yield (or silage maize yield) multiplied by the average market price in the respective year.			2999
																0		Crop_SICS
																		AMT_SICS
		Notes:
		*Type of price may be: real price obtained, market price, estimated price, surrogate price, opportunity cost, other.
		Benefits specified in this question should refer to the area/unit defined in the Overview worksheet
		Benefits can include:
		Products harvested (cash and food crops, timber, fuelwood, fruits and nuts, animal fodder, etc.)
		Grazing/browsing
		Recreation/tourism
		Subsidies (e.g. for agri-environmental measures)
		Protection against natural hazards
		If benefits are measured but not valued, do include them with unit price '0' and add a comment

## Sheet: Summary
		Summary costs & benefits
			Control		SICS
		Cropping system	Mulch sowing without catch crop (MSoCC/MSoZF)		Mulch sowing with catch crop (MSwCC/MSmZF)
		Investment costs	929.57		1035.7
		Maintenance costs	225.61		258.32
		Production costs	1942.36		2071.23
		Benefits	2837		2999
		Benefits - costs (entire crop rotation)	-260.54	0	-366.25

## Sheet: Codes
	Dropdown list Production costs	Dropdown list Treatments
	Soil mobilization	This section describes the required information on the SICS (crop_SICS, AMT_SICS) and the control system (crop_control, AMT_control)
	Sowing	0
	Transplanting	0
	Grazing	0
	Irrigation	0
	Fertilization	Crop 5
	Phytosanitary treatment	Crop 6
	Weeding	Crop 7
	Pruning
	Thinning
	Fencing
	Harvesting
		Dropdown benefit value
		Real price obtained
		Market price
		Estimated value
		Surrogate price
		Opportunity cost
		Other
