# Supplementary material
Source: MDPI journal article supplement (https://www.mdpi.com/2073-445X/11/5/729)

# A new framework to assess sustainability of soil improving cropping systems in Europe

Abdallah Alaoui<sup>1,\*</sup>, Moritz Hallama<sup>2</sup>, Roger Bär<sup>3</sup>, Ioanna Panagea<sup>4</sup>, Felicitas Bachmann<sup>3</sup>, Carola Pekrun<sup>5</sup>, Luuk Fleskens<sup>6</sup>, Ellen Kandeler<sup>2</sup>, Rudi Hessel<sup>7</sup>

*Land* **2022**, *11*, 729. <https://doi.org/10.3390/land11050729>

## Supplementary Material S3: Results of the statistical analysis—study site in Tachenhausen, Germany

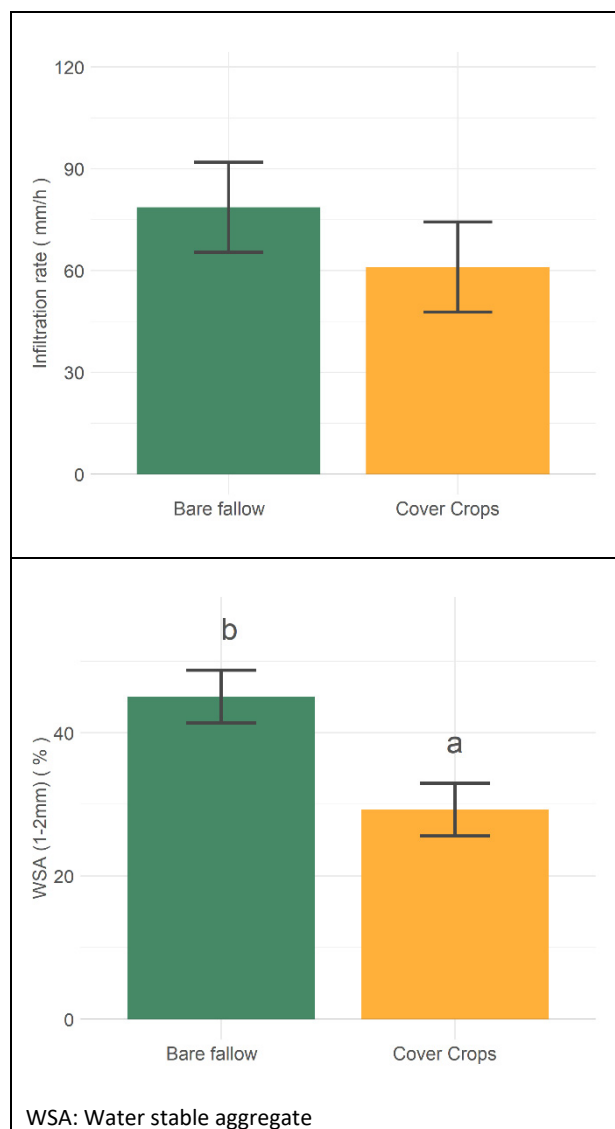

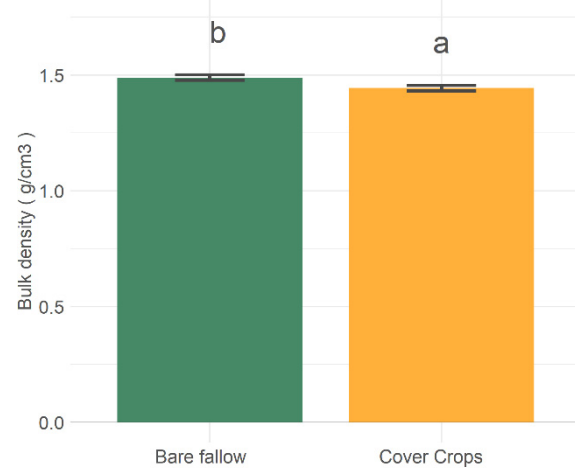

Penetration resistance: No data

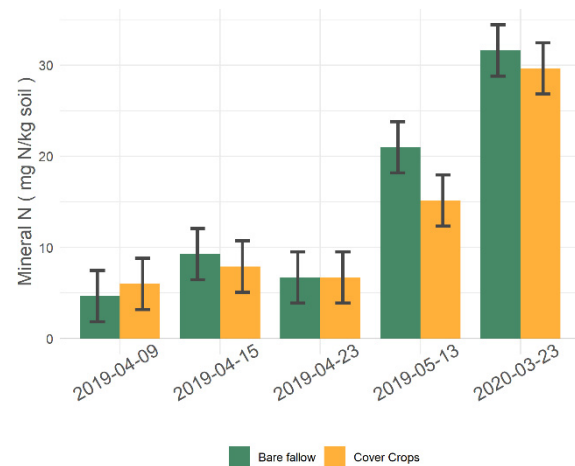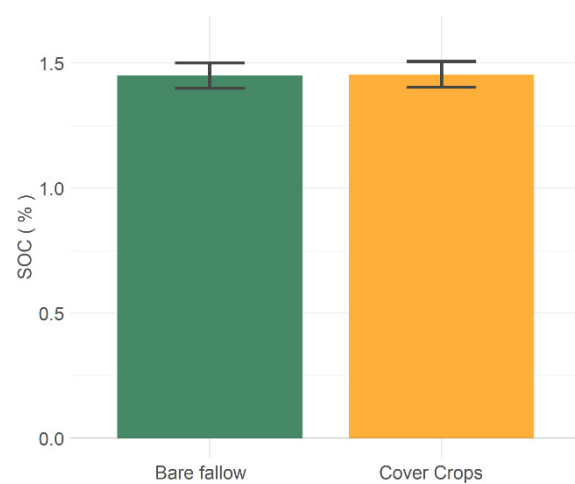

SOC: Soil Organic Carbon;

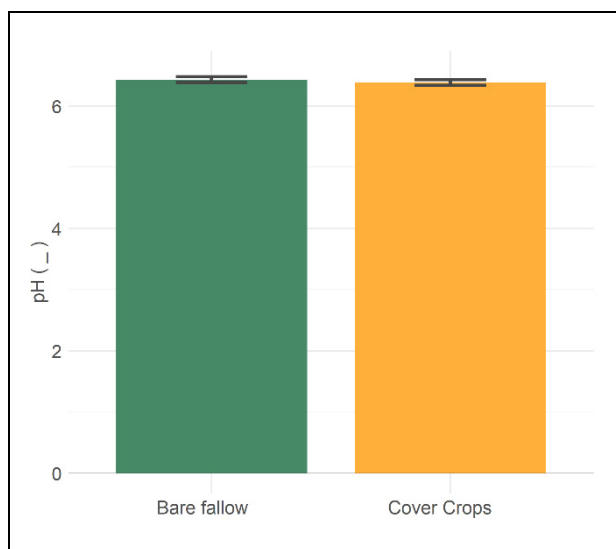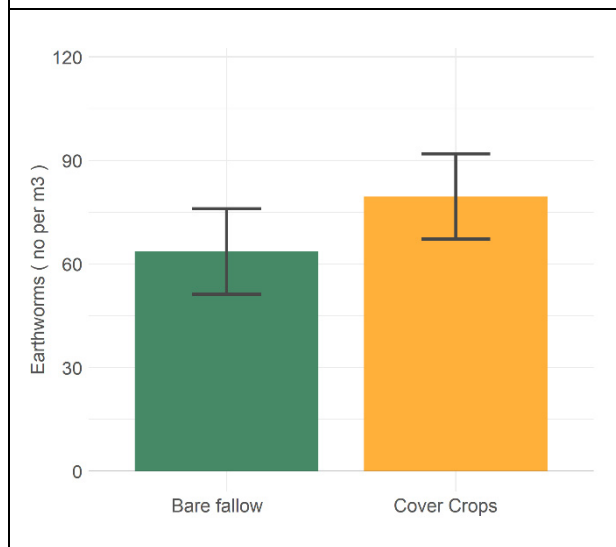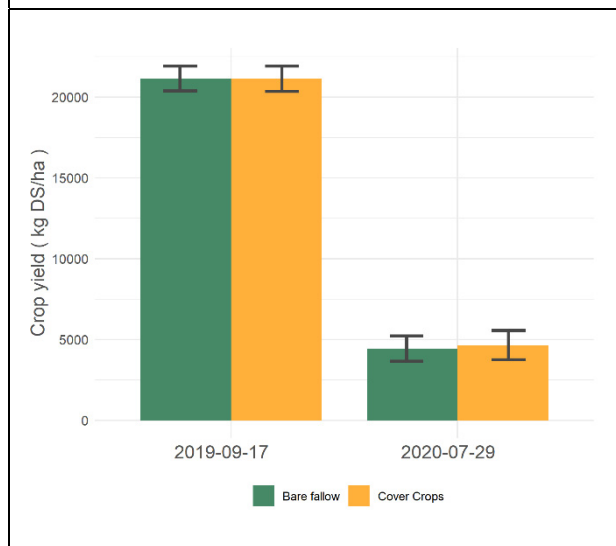

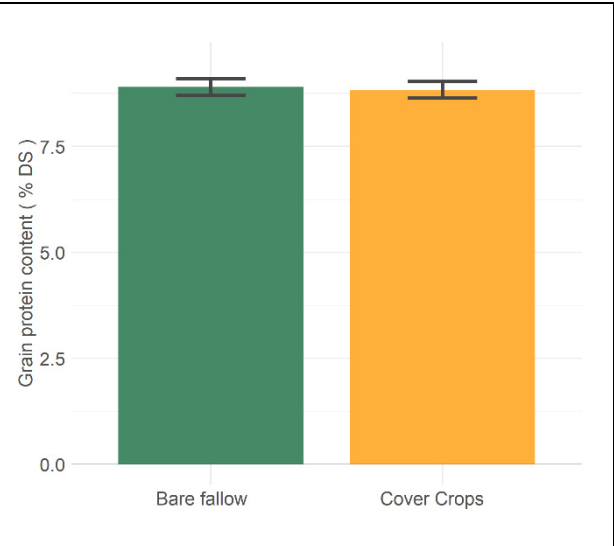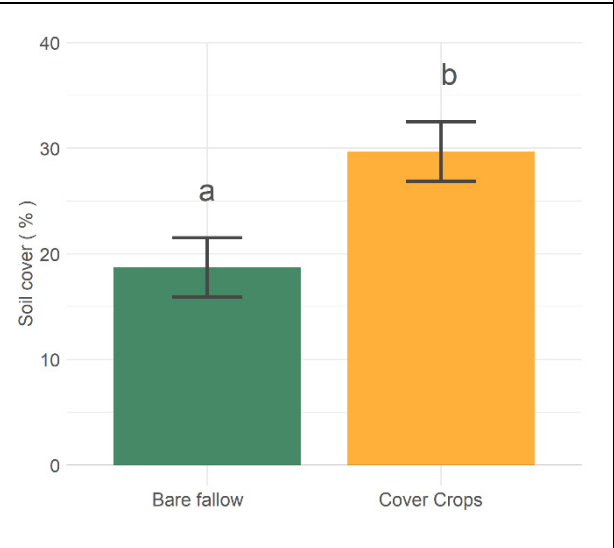

Pests: no data

Root diseases: no data

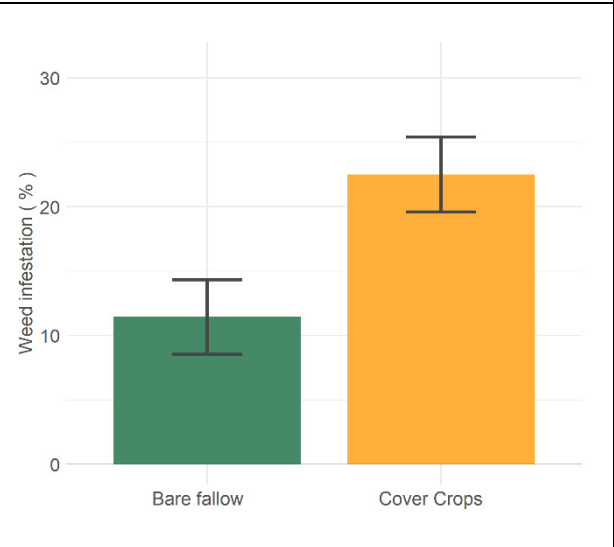

Supplement: s1 [file s1 › Supplementary Material File S3.pdf]
